# Supplementary material
Source: PubMed Central journal article supplement (PMC7395653)
Supplement: mmc1.pdf [file mmc1.pdf]

# **Epidemiological pattern, incidence, and outcomes of COVID-19 in liver transplant patients**

Jordi Colmenero, Manuel Rodríguez-Perálvarez, Magdalena Salcedo, Ana Arias-Milla, Alejandro Muñoz-Serrano, Javier Graus, Javier Nuño, Mikel Gastaca, Javier Bustamante-Schneider, Alba Cachero, Laura Lladó, Aránzazu Caballero, Ainhoa Fernández-Yunquera, Carmelo Loinaz, Inmaculada Fernández, Constantino Fondevila, Miquel Navasa, Mercedes Iñarrairaegui, Lluís Castells, Sonia Pascual, Pablo Ramírez, Carmen Vinaixa, María Luisa González-Dieguez, Rocío González-Grande, Loreto Hierro, Flor Nogueras, Alejandra Otero, José María Álamo, Gerardo Blanco-Fernández, Emilio Fábrega, Fernando García-Pajares, José Luis Montero, Santiago Tomé, Gloria De la Rosa, José Antonio Pons

|                   |   |
|-------------------|---|
| Table of contents |   |
| Table S1.....     | 2 |
| Table S2.....     | 3 |

**Table S1.** Calculation of standardized incidence ratio of coronavirus-19 disease during the Spanish epidemics from February 20, until April 7, 2020. Cumulative incidence of the general population was adjusted according to age and gender to match the liver transplant population.

\* As of April 7<sup>th</sup>, 2020, the Spanish Ministry of Health had confirmed 146,690 patients

|                                                               |        | GENERAL POPULATION |                    |                                                                                | LIVER TRANSPLANT POPULATION |                    |                                                      |
|---------------------------------------------------------------|--------|--------------------|--------------------|--------------------------------------------------------------------------------|-----------------------------|--------------------|------------------------------------------------------|
| Population age interval (years old)                           | Gender | N                  | COVID-19 positive* | Crude cumulative incidence (x10 <sup>5</sup> people)                           | N                           | COVID-19 positive* | Crude cumulative incidence (x10 <sup>5</sup> people) |
| 0-19                                                          | Men    | 4,772,317          | 602                | 12.61                                                                          | 313                         | 1                  | 319.48                                               |
|                                                               | Women  | 4,481,988          | 625                | 13.94                                                                          | 285                         | 0                  | 0                                                    |
| 20-39                                                         | Men    | 5,540,648          | 8,497              | 153.36                                                                         | 310                         | 0                  | 0                                                    |
|                                                               | Women  | 5,474,878          | 13,307             | 243.05                                                                         | 280                         | 1                  | 357.14                                               |
| 40-49                                                         | Men    | 3,943,490          | 10,105             | 256.24                                                                         | 479                         | 3                  | 626.30                                               |
|                                                               | Women  | 3,869,686          | 12,173             | 314.57                                                                         | 333                         | 4                  | 1,201.20                                             |
| 50-59                                                         | Men    | 3,457,353          | 12,818             | 370.74                                                                         | 2,373                       | 8                  | 337.12                                               |
|                                                               | Women  | 3,516,656          | 14,620             | 415.73                                                                         | 693                         | 2                  | 288.60                                               |
| 60-69                                                         | Men    | 2,543,236          | 13,398             | 526.80                                                                         | 3,601                       | 40                 | 1,110.80                                             |
|                                                               | Women  | 2,738,641          | 11,387             | 415.79                                                                         | 1,029                       | 13                 | 1,263.36                                             |
| 70+                                                           | Men    | 3,357,068          | 25,693             | 765.34                                                                         | 2,432                       | 27                 | 1,110.20                                             |
|                                                               | Women  | 4,944,814          | 23,465             | 474.54                                                                         | 1,127                       | 12                 | 1,064.77                                             |
| <b>Overall</b>                                                |        | 47,026,208         | 146,690            | 311.93                                                                         | 13,255                      | 111                | 837.41                                               |
| <b>STANDARDIZED INCIDENCE RATIO (95% CONFIDENCE INTERVAL)</b> |        |                    |                    | <b>Observed 280,501; Expected 146,690<br/>191.22<br/>(95%CI 190.28-192.16)</b> |                             |                    |                                                      |

diagnosed with Covid-19, but data on age and gender were available in 100,424 cases (68.5%). To estimate the true adjusted rates in the general population, age and gender distribution was inferred to the total number of confirmed cases.

**Table S2.** Calculation of standardized mortality ratio of coronavirus-19 disease during the Spanish epidemics from February 20, until April 7, 2020. Cumulative incidence of the general population was adjusted according to age and gender to match the liver transplant population.

|                                                               |        | GENERAL POPULATION |                  |                                                                           | LIVER TRANSPLANT POPULATION |                  |                           |
|---------------------------------------------------------------|--------|--------------------|------------------|---------------------------------------------------------------------------|-----------------------------|------------------|---------------------------|
| Population age interval (years old)                           | Gender | COVID-19 positive* | Number of deaths | Crude mortality rates (%)                                                 | COVID-19 positive           | Number of deaths | Crude mortality rates (%) |
| 0-19                                                          | Men    | 602                | 3                | 0.50                                                                      | 1                           | 0                | 0                         |
|                                                               | Women  | 625                | 5                | 0.80                                                                      | 0                           | 0                | 0                         |
| 20-39                                                         | Men    | 8,497              | 69               | 0.81                                                                      | 0                           | 0                | 0                         |
|                                                               | Women  | 13,307             | 55               | 0.41                                                                      | 1                           | 0                | 0                         |
| 40-49                                                         | Men    | 10,105             | 153              | 1.51                                                                      | 3                           | 0                | 0                         |
|                                                               | Women  | 12,173             | 84               | 0.69                                                                      | 4                           | 0                | 0                         |
| 50-59                                                         | Men    | 12,818             | 461              | 3.59                                                                      | 8                           | 0                | 0                         |
|                                                               | Women  | 14,620             | 206              | 1.41                                                                      | 2                           | 0                | 0                         |
| 60-69                                                         | Men    | 13,398             | 1,355            | 10.11                                                                     | 40                          | 5                | 12.5                      |
|                                                               | Women  | 11,387             | 569              | 4.99                                                                      | 13                          | 3                | 23.08                     |
| 70+                                                           | Men    | 25,693             | 10,864           | 42.28                                                                     | 27                          | 7                | 25.93                     |
|                                                               | Women  | 23,465             | 7,893            | 33.63                                                                     | 12                          | 5                | 41.67                     |
| <b>Overall</b>                                                |        | 146,690            | 21,717           | 14.80                                                                     | 111                         | 20               | 18.01                     |
| <b>STANDARDIZED MORTALITY RATIO (95% CONFIDENCE INTERVAL)</b> |        |                    |                  | <b>Observed 20,741; Expected 21,707<br/>95.55<br/>(95%CI 94.25-96.85)</b> |                             |                  |                           |

\* As of April 7<sup>th</sup>, 2020, the Spanish Ministry of Health had confirmed 146,690 patients diagnosed with Covid-19, but data on age and gender were available in 100,424 cases (68.5%). To estimate the true adjusted rates in the general population, age and gender distribution was inferred to the total number of confirmed cases. Data regarding mortality was obtained on April 21<sup>st</sup>, 2020, aligning with the follow-up closing of the SETH registry.
