# Supplementary material
Source: PubMed Central journal article supplement (PMC7395653)
Supplement: mmc2.pdf [file mmc2.pdf]

## Journal of Hepatology

### CTAT methods

Tables for a “Complete, Transparent, Accurate and Timely account” (CTAT) are now mandatory for all revised submissions. The aim is to enhance the reproducibility of methods.

- Only include the parts relevant to your study
- Refer to the CTAT in the main text as ‘Supplementary CTAT Table’
- Do not add subheadings
- Add as many rows as needed to include all information
- Only include one item per row

**If the CTAT form is not relevant to your study, please outline the reasons why:**

|  |
|--|
|  |
|--|

#### 1.1 Antibodies

| Name           | Citation | Supplier | Cat no. | Clone no. |
|----------------|----------|----------|---------|-----------|
| Not applicable |          |          |         |           |

#### 1.2 Cell lines

| Name           | Citation | Supplier | Cat no. | Passage no. | Authentication test method |
|----------------|----------|----------|---------|-------------|----------------------------|
| Not applicable |          |          |         |             |                            |

#### 1.3 Organisms

| Name           | Citation | Supplier | Strain | Sex | Age | Overall n number |
|----------------|----------|----------|--------|-----|-----|------------------|
| Not applicable |          |          |        |     |     |                  |

#### 1.4 Sequence based reagents

| Name           | Sequence | Supplier |
|----------------|----------|----------|
| Not applicable |          |          |

#### 1.5 Biological samples

| Description    | Source | Identifier |
|----------------|--------|------------|
| Not applicable |        |            |

#### 1.6 Deposited data

| Name of repository | Identifier                                                                                                    | Link |
|--------------------|---------------------------------------------------------------------------------------------------------------|------|
| Mendeley           | <a href="https://data.mendeley.com/datasets/5ssscvfmxn/1">https://data.mendeley.com/datasets/5ssscvfmxn/1</a> |      |

## 1.7 Software

| Software name | Manufacturer | Version |
|---------------|--------------|---------|
| SPSS          | IBM corp.    | 22.0    |

## 1.8 Other (e.g. drugs, proteins, vectors etc.)

|      |  |  |
|------|--|--|
| None |  |  |
|      |  |  |

## 1.9 Please provide the details of the corresponding methods author for the manuscript:

Manuel Luis Rodríguez-Perálvarez, MD, PhD. Hospital Universitario Reina Sofía. Avda. Menéndez Pidal s/n, Postal code 14004, Córdoba, Spain. Phone: +34 617854692 E-mail: ropeml@hotmail.com; manuell.rodriguez.sspa@juntadeandalucia.es

## 2.0 Please confirm for randomised controlled trials all versions of the clinical protocol are included in the submission. These will be published online as supplementary information.

Not applicable
